# Supplementary material for: Exogenous Ketone Supplements Improved Motor Performance in Preclinical Rodent Models
Source: MDPI journal article supplement (doi:10.3390/nu12082459), 2020-08-15
Supplement: s1 [file s1]

**TD.10911****Ketogenic Diet 2  
(MCT, Flax, Canola)****Formula**

|                                      | <b>g/Kg</b> |
|--------------------------------------|-------------|
| Casein                               | 300.0       |
| L-Cystine                            | 2.86        |
| Cellulose                            | 245.31      |
| Medium Chain Triglycerides (MCT) Oil | 270.0       |
| Flaxseed Oil                         | 70.0        |
| Canola Oil                           | 60.0        |
| Mineral Mix, Ca-P Deficient (79055)  | 18.5        |
| Calcium Phosphate, dibasic           | 8.5         |
| Calcium Carbonate                    | 10.75       |
| Vitamin Mix, Teklad (40060)          | 14.0        |
| Ethoxyquin, antioxidant              | 0.08        |

**Footnote**

Modified from TD.10787 to replace maltodextrin with cellulose to make diet essentially free of carbohydrate. Diet has a 2:1 ratio of n-3 to n-6 fatty acids and a 1.5:1 ratio of fat to protein + carbohydrate. Compared to TD.10787, TD.10911 has the same % fat (wt/wt) but has a higher % kcal from fat, because carbohydrate was removed and replaced with cellulose.

**Selected Nutrient Information<sup>1</sup>**

|                     | <b>% by weight</b> | <b>% kcal from</b> |
|---------------------|--------------------|--------------------|
| <b>Protein</b>      | 26.4               | 22.4               |
| <b>Carbohydrate</b> | 0.6                | 0.5                |
| <b>Fat</b>          | 40.3               | 77.1               |

**Kcal/g 4.7**<sup>1</sup> Values are calculated from ingredient analysis or manufacturer data*Teklad Diets are designed & manufactured for research purposes only.***Speak With A Nutritionist**

- (800) 483-5523
- askanutritionist@harlan.com

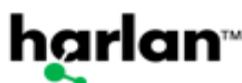

Harlan Laboratories · PO Box 44220 · Madison, WI 53744-4220

[www.harlan.com](http://www.harlan.com)**Key Features**

- Purified Diet
- Ketogenic Diet (1.5:1 Ratio)
- Omega-3 fatty acids & MCT
- Very Low Carbohydrate

**Key Planning Information**

- Products are made fresh to order
- Store product at 4°C or lower
- Use within 6 months (applicable to most diets)
- Box labeled with product name, manufacturing date, and lot number
- Replace diet at minimum once per week  
*More frequent replacement may be advised*
- Lead time:
  - 2 weeks non-irradiated
  - 4 weeks irradiated

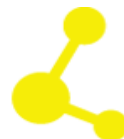**Product Specific Information**

- Powder (paste)
- Minimum order 3 Kg
- Irradiation available upon request

**Options (Fees Will Apply)**

- Rush order (pending availability)
- Irradiation (see Product Specific Information)

**International Inquiry**

· Outside U.S.A. or Canada ·

- askanutritionist@harlan.com

**Place Your Order (U.S.A. & Canada)**

· Place Order · Obtain Pricing ·  
· Check Order Status ·

- (800) 483-5523
- (608) 277-2066 *facsimile*
- tekladinfo@harlan.com

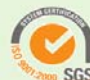*Helping you do research better*
